# Supplementary material for: Geometrical shape adjustment of KTa0.5Nb0.5O3nanofillers for tailored dielectric properties of KTa0.5Nb0.5O3/PVDF composite
Source: Royal Society of Chemistry journal article supplement (doi:10.1039/c7tc01744h), 2017-01-01
Supplement: c7tc01744h1.pdf [file c7tc01744h1.pdf]

## **Geometrical shape adjustment of $\text{KTa}_{0.5}\text{Nb}_{0.5}\text{O}_3$ nanofillers for tailored dielectric properties of $\text{KTa}_{0.5}\text{Nb}_{0.5}\text{O}_3/\text{PVDF}$ composite**

**Gaoru Chen<sup>a</sup>, Wenlong Yang<sup>b,\*</sup>, Jiaqi Lin<sup>a, b,\*</sup>, Xuan Wang<sup>a</sup>, Dongping Li<sup>a,c</sup>,**

**Yu Wang<sup>b</sup>, Mengfan Liang<sup>b</sup>, Weimin Ding<sup>c</sup>, Haidong Li<sup>b</sup> and Qingquan Lei<sup>a</sup>**

<sup>a</sup>*Key Laboratory of Engineering Dielectrics and Its Application, Ministry of Education,*

*Harbin University of Science and Technology, Harbin, 150080, P.R. China*

<sup>b</sup>*Department of Applied Science, Harbin University of Science and Technology,*

*Harbin 150080, P.R. China*

<sup>c</sup>*College of Chemical and Environmental Engineering, Harbin University of Science and*

*Technology, Harbin 150080, P.R. China*

\*E-mail address: yangwenlong1983@163.com; ljqi405@163.com

Telephone number: +86-451-8639-2428

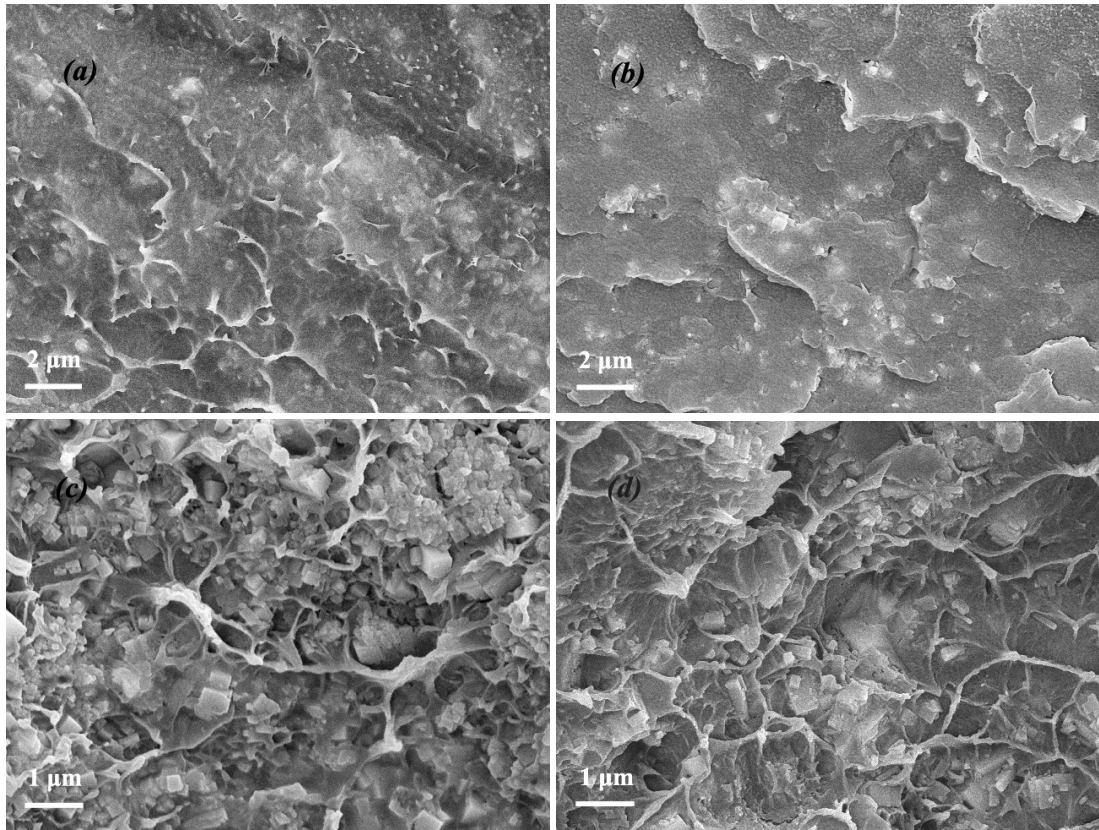

**Fig. S1** SEM images of the fractured cross-section of (a) 5 vol% NC-KTN/PVDF composite film, (b) 5 vol% NR-KTN/PVDF composite film, (c) 30 vol% NC-KTN/PVDF composite film and (d) 30 vol% NR-KTN/PVDF composite film.
